# Supplementary material for: Sigma factor 1 in chloroplast gene transcription and photosynthetic light acclimation
Source: PubMed Central journal article supplement (PMC6977190; doi:10.1093/jxb/erz464), 2019-10-23
Supplement: erz464_suppl_supplementary_table_s1.pdf [file erz464_suppl_supplementary_table_s1.pdf]

Supplementary Table 1. Primers used for qRT-PCR, genotyping and complementation

| Purpose    | Gene                          | Primer name        | Sequence 5' to 3'           |
|------------|-------------------------------|--------------------|-----------------------------|
| qRT-PCR    | <i>PsaA</i>                   | PsaA-F             | GGCACAAGCATCTCAGGTAA        |
|            |                               | PsaA-R             | AGCCCAAACAATGGATTCAA        |
|            | <i>PsbA</i>                   | PsbA-F             | GGTTACAGATTTCGGGCAAGA       |
|            |                               | PsbA-R             | AATACCTACTACCGGCAAGC        |
|            | <i>PsbB</i>                   | PsbB-F             | CTGCTCTAGTTGCTGGTTGG        |
|            |                               | PsbB-R             | CGCCCCAAGAATTGGTTATT        |
|            | <i>PsbD</i>                   | PsbD-F             | CTTTAGGGGGTTGGTTCACA        |
|            |                               | PsbD-R             | GCTTCAGGACCCACAGTAA         |
|            | <i>PsbE</i>                   | PsbE-F             | TGTCTGGAAGCACAGGAGAA        |
|            |                               | PsbE-R             | GAGGGCTCCCGAACACAT          |
|            | <i>PetB</i>                   | PetB-F             | ATTGGGCGGTCAAAATTGTA        |
|            |                               | PetB-R             | AGACGGCCGTAAAGAAGAGGT       |
|            | <i>AtpB</i>                   | AtpB-F             | ATGAGTGCGACAGAGGGTTT        |
|            |                               | AtpB-R             | TGTGCGAGTATCGACAGGAC        |
|            | <i>NdhB</i>                   | NdhB-F             | TACGAAGGATCTCCCCTCC         |
|            |                               | NdhB-R             | GCTAAGAATAGCTAGGATTCCAGA    |
|            | <i>RbcL</i>                   | RbcL-F             | CACCACAAACAGAGACTAAAGCA     |
|            |                               | RbcL-R             | CCTGCTTCTTCAGGTGGAAC        |
|            | <i>TrnD</i>                   | TrnD-F             | GGGATTGTAGTTCAATTGGTCAGA    |
|            |                               | TrnD-R             | GACTGACGGGGCTCGAA           |
|            | <i>RpoB</i>                   | RpoB-F             | TGCTAAGTTTCCAAAAATTGAAGA    |
|            |                               | RpoB-R             | CAAATTAATCCCGCGGATAC        |
|            | <i>RpoTp</i>                  | RpoTp-F            | GAGCAGGAGGTGAGGATTCA        |
|            |                               | RpoTp-R            | ACACGTTTCCCTAAGCAATTGC      |
|            | <i>Lhcb1.2</i>                | Lhcb1.2-F          | CATCTGAAGTCCTCGGAAGC        |
|            |                               | Lhcb1.2-R          | GGAAGTCTCCGGTAAGGTAGC       |
|            | <i>Lhcb2.2</i>                | Lhcb2.2-F          | CTCCCCAAAGCATCTGGTAT        |
|            |                               | Lhcb2.2-R          | GCTCACGGTCTTAGCGAAT         |
|            | <i>SIG1</i>                   | SIG1-F             | TCATAAGTCAAGATTGAAGGATAGATT |
|            |                               | SIG1-R             | CAAACGCACATTACTCATAGCC      |
|            | <i>SIG2</i>                   | SIG2-F             | TGTGCCCTAAACACAACAA         |
|            |                               | SIG2-R             | TGCCTGTCTGATATAAGGGAATC     |
|            | <i>SIG3</i>                   | SIG3-F             | TCCCAAACAGATTGTTGGTTC       |
|            |                               | SIG3-R             | CAATAACGAGAGCCAATGTTTA      |
|            | <i>SIG4</i>                   | SIG4-F             | TTGTACCTCAAGGAAGGAGCA       |
|            |                               | SIG4-R             | CTTTTCTCTCGTCTTTTCTACG      |
|            | <i>SIG5</i>                   | SIG5-F             | TGAAGGCTCTTCTTGAAGTGAA      |
|            |                               | SIG5-R             | TTAATAAGTTTGTTCCTTGCAGCTC   |
|            | <i>SIG6</i>                   | SIG6-F             | TCCTTCTCTGTAGTGATGCTT       |
|            |                               | SIG6-R             | TCGTCTCTTAACGCATGTGA        |
|            | <i>Actin8</i>                 | Actin8-F           | TTCCAGCAGATGTGGATCTCTA      |
|            |                               | Actin8-R           | AGAAAGAAATGTGATCCCGTCA      |
| Genotyping | <i>SIG1</i><br>(SALK_147985c) | 985-LP             | TGTATTCTGAAACCGGAGTG        |
|            |                               | 985-RP             | ATGATGATTTGGCACTCAAGG       |
|            | <i>SIG1</i><br>(CS371990)     | 990-LP             | GCTTCTACTGAGAAGCCA          |
|            |                               | 990-RP             | TCAATTCTTAAGGATCAT          |
|            | <i>LBb1.3</i>                 | LBb1.3             | ATTTTGCCGATTTTCGGAAC        |
|            | <i>SIG1</i><br>(RT-PCR)       | SIG1-F             | GCTTCTACTGAGAAGCCA          |
| SIG1-R     |                               | TCAATTCTTAAGGATCAT |                             |

|                        |                               |           |                                                                  |
|------------------------|-------------------------------|-----------|------------------------------------------------------------------|
|                        | <i>Actin8</i><br>(RT-PCR)     | Actin8-F  | TTCCAGCAGATGTGGATCTCTA                                           |
|                        |                               | Actin8-R  | AGAAAGAAATGTGATCCCGTCA                                           |
| <b>Complementation</b> | <i>SIG1</i><br>(SALK_147985c) | C-XhoI-F  | GCGCGCctcgagATGGCTACTGCAGCTGTT                                   |
|                        |                               | C-EcoR1-R | GCGCGCgaattcTCAAGCGTAATCTGGAACA<br>TCGTATGGGTAATTCTTAAGGATCATTGC |

Letters in lowercase denote restriction sites. The stop codon is shaded in red and the coding sequence for the HA epitope is highlighted in green.
